# Supplementary material
Source: publisher figshare collection journal article supplement (https://adisjournals.figshare.com/ndownloader/files/32873270)
Supplement: Supplementary file 1 [file 32873270]

## Trilaciclib: Adis Evaluation

### Clinical Considerations

- First intravenous CDK 4/6 inhibitor approved to decrease the incidence of chemotherapy-induced myelosuppression (CIM) in patients with ES-SCLC
- Administered prior to chemotherapy
- Provides multilineage myeloprotection, reducing the need for supportive care interventions and dose delays/reductions and hospitalizations related to CIM and sepsis
- Provides improvements in patient-reported outcomes
- Improves overall safety profile of chemotherapy regimens

### Plain Language Summary

#### *Background and rationale*

- As well as destroying cancer cells, chemotherapy also damages healthy, rapidly growing cells in the body, including blood-forming cells in the bone marrow (i.e. bone marrow suppression; also known as myelosuppression). This results in low levels of white blood cells (increasing the risk of infection), red blood cells (causing anemia) and platelets (increasing the risk of bleeding).
- Bone marrow suppression often occurs after treatment with the highly toxic chemotherapies, such as those used in the treatment of extensive-stage small cell lung cancer (ES-CLC).
- Trilaciclib (COSELA™) is a drug that transiently protects the white and red blood cells and platelets from chemotherapy damage during treatment.

#### *Clinical findings*

- Trilaciclib administration prior to standard-of-care chemotherapy for ES-SCLC reduced chemotherapy-induced myelosuppression (CIM) and the need for rescue interventions, chemotherapy dose reductions/delays and hospitalizations related to CIM and infection.
- The safety profile of the chemotherapy regimens was improved without affecting antitumour efficacy

#### *Conclusion*

Trilaciclib fulfils an unmet need to reduce the incidence of CIM, which is particularly relevant in patients with ES-SCLC for which the cornerstone of treatment is chemotherapy

This plain language summary represents the opinions of the authors. For a full list of declarations, including funding and author disclosure statements, please see the full text online. © Springer Nature Switzerland AG 2022.
